# Supplementary material
Source: Springer Nature journal article supplement (https://www.springermedizin.de/resource/supplementary/12872_2012_582_MOESM5_ESM.pdf/9430280)

**Nitrite Concentration  
( $\mu\text{M}$ )**

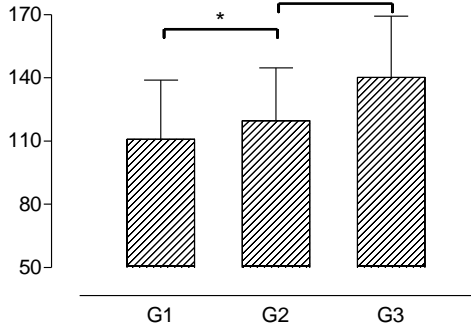

**T-BARS ( $\mu\text{M}$ )**

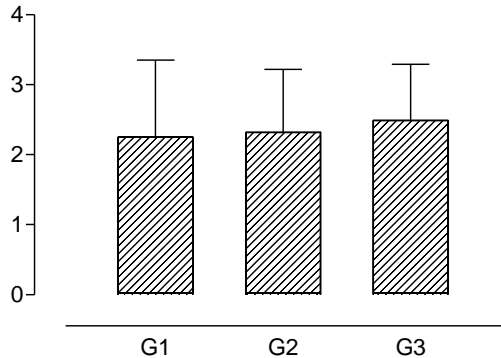

Supplement: MOESM5 [file 9430280]
